# Supplementary material for: BnPLP1 Positively Regulates Flowering Time, Plant Height, and Main Inflorescence Length in Brassica napus
Source: MDPI journal article supplement (doi:10.3390/genes14122206), 2023-12-13
Supplement: s1 [file s1]

## Sequence Identity: 96.5%

|            |                                                                                   |     |
|------------|-----------------------------------------------------------------------------------|-----|
| BnPLP1_CDS | ATGGATTCCGACGCGACCGTGGCCACTGAGCGAGCGCCCGGAGTGGTCCGACGTTGTCCCGTTGACTCAGGACGATGGTCC | 80  |
| BnPLP2_CDS | ATGGATTCCGACTCAACCGTGCCACTGAGCGAGCGCCCGGAGTGGTCTGACGTTGTCCCGTTGACTCAGGACGATGGTCC  | 80  |
| BnPLP1_CDS | GAACCCGGTGGTTCGATCGCTTACAAGGAAGACTTCCGGGAGACGATGGATTACTTCCGGGCGATTACCGCTCCGACG    | 160 |
| BnPLP2_CDS | GAACCCGGTGGTTCGATCGCTTACAAGGAAGACTTCCGGGAGACGATGGATTACTTCCGGGCGATTACCGCTCCGACG    | 160 |
| BnPLP1_CDS | AGCGTTCTCTCGCGCGCTGCGACTCACGGAAGAAGCTCTCCGCTTAAACTCCGGCAACTACACCGTGTGGCACTTCAGG   | 240 |
| BnPLP2_CDS | AGCGTTCTCTCGCGCGCTGCGACTCACGGAAGAAGCTCTCCGCTTAAACTCCGGCAACTACACCGTGTGGCACTTCAGG   | 240 |
| BnPLP1_CDS | CGCTTAGTACTGGAGGAGCTTGATCACGACTTGTATGAAGAGCTCAAGTTCATCGAAAGCATTGCTGAGGATAACTCCAA  | 320 |
| BnPLP2_CDS | CGCTTAGTACTCGAGGAGCTTAATAACGACTTGTATGAAGAGCTCAAGTTCATCGAAAGCATTGCTGAGGATAACTCTAA  | 320 |
| BnPLP1_CDS | GAACTACCAGTTGTGGCATCATCGGAGATGGGTTGCAGAGAAACTGGGTCTGATGTTGCAGGAAAGGAACCTTGACTTTA  | 400 |
| BnPLP2_CDS | GAACTACCAGTTGTGGCATCATCGACGATGGGTTGCAGAGAAACTGGGTCTGATGTTGCAGGAAAGGAACCTTGACTTTA  | 400 |
| BnPLP1_CDS | CTCGGAGCATACTATCACTTGATGCCAAACATTATCATGCTTGGTCACATAGGCAGTGGGCACTACAAGCATTAGGTGGA  | 480 |
| BnPLP2_CDS | CTCGGAGGCTACTATCACTTGATGCCAAGCATTATCATGCTTGGTCACATAGGCAGTGGGCGCTACAAGCATTAGGAGGA  | 480 |
| BnPLP1_CDS | TGGGAAAATGAGCTTGATTAAGTCTCATGAGCTCCTTGAAGCTGACGCTTTAACAACCTCTGCATGGAATCAGAGGTATTA | 560 |
| BnPLP2_CDS | TGGGAAAATGAGCTTAACTACTGCGACGAGCTCCTTGAAGCTGACGCTTTAACAACCTCTGCATGGAATCAGAGGTATTA  | 560 |
| BnPLP1_CDS | CGTTATAACTAGATCACCTTCGTTGGGGGGCCTAAAACCCATGAGAGAATCTGAAGTAAGCTACACAGTCAAAGCCATTT  | 640 |
| BnPLP2_CDS | CGTTATAACTAGATCACCTTCGTTGGGAGGCCTAGAAGCCATGAGAGAATCTGAAGTAAGCTACACAGTCAAAGCCATTT  | 640 |
| BnPLP1_CDS | TAGCAAATCCCGGGAACGAGAGCTCTTGGAGATACCTGAAAGCCCTTTACAAAGACGACACAGAGTCTTGGATTAGTGAT  | 720 |
| BnPLP2_CDS | TAGCAAATCCCGGGAACGAGAGCTCTTGGAGGTACCTGAAAGCCCTTTACAAAGACGACACAGAGTCTTGGATTAGTGAT  | 720 |
| BnPLP1_CDS | CCAAGTGTTTCTCAGTCTGTTTGAAAGTTCTGTCACGCACGGACTGCTTCCATGGATTTCGCTCTGAGCACCCCTTTTGGA | 800 |
| BnPLP2_CDS | CCAAGTGTTTCTCAGTCTGTTTGAAAGTTCTGTCACGCACGGACTGCTTCCATGGATTTCGCTCTGAGCACCCCTTTTGGA | 800 |
| BnPLP1_CDS | TCTTCTGTGCGATGGGTTGAGACCAACCAACGAGCATATAGACTCGGTGAAAGCTCTAGCTAATGAAGATCCAGAGGCTA  | 880 |
| BnPLP2_CDS | TCTTCTGTGCGATGGGTTGAGACCAACCAACGAGCATAGAGACTCGGTGAAAGCTCTAGCTAATGAAGAACCCAGAGACTA | 880 |
| BnPLP1_CDS | ACTTGGCCAATTTGGTGTGTACCATTCTGTGTCGTGTTGATCCTATAAGAGCTAACTATTGGGCATGGAGGAAGAGCAAA  | 960 |
| BnPLP2_CDS | ACTTGGCCAATTTGGTGTGTACCATTCTGTGTCGTGTTGATCCTATAAGAGCTAACTATTGGGCATGGAGGAAGAGCAAG  | 960 |
| BnPLP1_CDS | ATTACAGTGGCAATATAA                                                                | 978 |
| BnPLP2_CDS | ATTACAGTGGCAATATAA                                                                | 978 |
