# Supplementary material for: BnPLP1 Positively Regulates Flowering Time, Plant Height, and Main Inflorescence Length in Brassica napus
Source: MDPI journal article supplement (doi:10.3390/genes14122206), 2023-12-13
Supplement: s1 [file s1]

## Sequence Identity: 72.6%

```

BnPLP1_DNA -----TAATCTGTCTTCCATCCCTTA 23
BnPLP2_DNA ACACTGAGATCTAGTTCTTGAGGTCTGTGCTCTGTCCAATTACTTTGTCTTTCTTACATCTCAAAACCCACCCTAATA 80

BnPLP1_DNA AACCTAGTTTGAATCTGTTTGATTTTGGGCATCAGAGTAG-----CTTTTCGATCAGTCTGTG 81
BnPLP2_DNA CTCTCAAAATTATCACTCTCTTAGATTAGGGATCCAAGTCGGAACCCTAATTGAATCGTCTTGATTTCGATCAGTTGTG 160

BnPLP1_DNA -----AGGAAACATGGATTCCGACGCGACCGTGCCACTGAGCGAGCGCCCGGAGTGGTCCGACGTGTGCCCGTTGA 152
BnPLP2_DNA TGCAAAGGGAGGAAACATGGATTCCGACTCAACCGTGCCACTGAGCGAGCGCCCGGAGTGGTTCGACGTGTGCCCGTTGA 240

BnPLP1_DNA GTCAGGACGATGGTCCGAACCCGGTGGTTCCGATCGCTTACAAGGAAGACTTCCGCGAGACGATGGATTACTTCCGGGCG 232
BnPLP2_DNA CTCAGGACGATGGTCCGAACCCGGTGGTTCCGATCGCTTACAAGGAAGACTTCCGCGAGACGATGGATTACTTCCGGGCG 320

BnPLP1_DNA ATTTACCGTCCGACGAGCGTTCTCTCGCGCGCTGCGACTCACGGAAGAAGCTCTCCGCTTAAACTCCGGCAACTACAC 312
BnPLP2_DNA ATTTACCGTCCGACGAGCGTTCTCTCGCGCGCTGCGACTCACGGAAGAAGCTCTCCGCTTAAACTCCGGCAACTACAC 400

BnPLP1_DNA CGTAACTGATCCTTCTTCTTTG-CCCTACTACTACTCTTTGATTGATTAGATTGTAACCTCTCTTGTCTTGTGTTC 391
BnPLP2_DNA CGTAACTGATCCTTCTTCTTTG-CCCTAGTACTACTGTTCTTAAAGACTTGCAT-----TTGATTAGATTGTAAC 470

BnPLP1_DNA TTTTGAAGGTGTGGCACTTCAGGCGCTTAGTACTCGAGGAGCTTATCAGGACTTGTATGAAGAGCTCAAGTTTCATCGA 471
BnPLP2_DNA TTTTGAAGGTGTGGCACTTCAGGCGCTTAGTACTCGAGGAGCTTAAACAGGACTTGTATGAAGAGCTCAAGTTTCATCGA 550

BnPLP1_DNA AAGCATTGCTGAGGATAACTCAAGAATAACAGTTGTGGTAAAAAGTTTCATTCTTTTGTATTTTTCATTACACGTT 551
BnPLP2_DNA AAGCATTGCTGAGGATAACTCAAGAATAACAGTTGTGGTAAAAAGTTTCATACCTTTTGTCTCTTTGGTTTGTTCAT 630

BnPLP1_DNA TGTTTATACTGTGAAACAACAAGTGTATACGTCTACTATATGCTTTTCGTGGAATCATTTAACTTTTATATGTGACATGA 631
BnPLP2_DNA G-----AAAGTTCTTTCAATAGTGTCTTTAGAAATTTTAAACATGCTT-- 673

BnPLP1_DNA AAGTTTGCTCTTTTTTAAAGTCCATAGTGTTAAGCATATCTGCTGCTTTAAGAAAGTTCCTACTCTTTGTTTCTTTTTC 711
BnPLP2_DNA -----CCTTTGTTTC 682

BnPLP1_DNA ATGGGATGAGTAGTCTTTGTATATATACTGTGAAATTGACTGATGAATAGTTTGAACCAAGAACTGTATATGTTTTCGA 791
BnPLP2_DNA ATGCTTCTCTAGATTAGATGAAATCTTTAGTGTAGCTTATCTGATGCTTTAAGTAAG----- 743

BnPLP1_DNA TTTTGGAAATTCATTAGAACCTGAAAGACGTGTACATAGTGCATCTTCTGTATATTGAGATGAAAGCTTGCTCATCTG 871
BnPLP2_DNA ----- 743

BnPLP1_DNA CTGCTTTATGGAAGTTTAGCTTTGTCTGCTGGCTTTGATTGTGATGCTCAATGGCTCTGCTCTAATTTGTTTTTCAATTT 951
BnPLP2_DNA -----TTACAACCTTCGTTTGTCTTGTCTTTGATTTTGTGATGATCAATGGTCTGCTCTAACTT--TTTTGCTTT 810

BnPLP1_DNA TGTCTAGGCATCATCGGAGATGGGTTCAGAGAAACTGGGTCTGATGTTGCAGGAAAGGAACCTTGACTTTACTCGGAG 1031
BnPLP2_DNA TGTCTAGGCATCATCGACGATGGGTTCAGAGAAACTGGGTCTGATGTTGCAGGAAAGGAACCTTGACTTTACTCGGAG 890

BnPLP1_DNA CTACTATCAGTTGATGCCAAACATTATCATGCTTGGTCACATAGGCAGGTTTGTCTCTCGAAACATCTCTTAACCCAA 1111
BnPLP2_DNA GGTACTATCAGTTGATGCCAAGCATTATCATGCTTGGTCACATAGGCAGGTTTGTCTCTCAAAACATAATATAACTCAC 970

BnPLP1_DNA TCACTTGACCTG-----TAGTATTATCTTTTGTCTTATCTTGGTAAACAATCTACATTATTATGCTTACTCACATAGGC 1186
BnPLP2_DNA TCACTTGATGATGTTTATAGTATTATCTTTTGTCTTATCTTGGGAAACAATGTACATTATCATGCTTAAATCACATAGGC 1049

BnPLP1_DNA AGGTTTTTTAATCTCAGAACCTTGTTTAAAGCACTCACTATGTTATGCTATTTTTTTGTCTTATGTTGGGAAACAATCTG 1266
BnPLP2_DNA AGGTTTTTTAATCTCAGAACCTTGTTTAAAGCACTTACTATGATGTTATCATCTTTGCTTATGTTGGGAAACAATCTG 1129

BnPLP1_DNA TAGTGGGCACTACAAGCATTAGGTGGATGGGAAAATGAGCTTGATTACTGTCATGAGCTCCTTGAAGCTGACGTCTTTAA 1346
BnPLP2_DNA CAGTGGGCGCTACAAGCATTAGGAGGATGGGAAAATGAGCTTAACTACTGCCACGAGCTCCTTGAAGCTGACGTCTTTAA 1209

BnPLP1_DNA CAACTCTGCATGGAATCAGGTAAATATGATTATCAATACACAATGCTAGATTATGTTTCCCAAATTATAATTG----- 1420
BnPLP2_DNA CAACTCTGCATGGAATCAGGTAAATATGATTATCAATACACAATGCTAATATGTTTCCCAAATTATGATTGGCAATT 1288

BnPLP1_DNA -CCTTCTTAAATCAAACTTTGCAGAGGTATTACGTTATACTAGATCACCTTCGTTGGGGGGCCTAAACCCATGAGAGA 1499
BnPLP2_DNA CAGTCTTCTTTTAAATCTTGACAGAGGTATTACGTTATACTAGATCACCTTCGTTGGGAGGCTAGAAAGCCATGAGAGA 1368

BnPLP1_DNA ATCTGAAGTAAGCTACACAGTCAAAGCCATTTTAGCAAAATCCCGGGAACGAGAGCTCTGGAGATACCTGAAAGCCCTTT 1579
BnPLP2_DNA ATCTGAAGTAAGCTACACAGTCAAAGCCATTTTAGCAAAATCCCGGGAACGAGAGCTCTGGAGGTACCTGAAAGCCCTTT 1448

BnPLP1_DNA ACAAGACGACACAGAGTCTTGGATTAGTGATCCAAGTGTTCCTCAGTCTGTTTGAAGTTCTGTCACGCACGGACTGC 1659
BnPLP2_DNA ACAAGACGACACAGAGTCTTGGATTAGTGATCCAAGTGTTCCTCAGTCTGTTTGAAGTTCTGTCACGCACGGACTGC 1528

BnPLP1_DNA TTCCATGGATTCTGCTCTGAGCACCCTTTTGGATCTTCTGTGCGATGGGTTGAGACCAACCAACGAGCATATAGACTCGGT 1739
BnPLP2_DNA TTCCATGGATTCTGCTCTGAGCACCCTTTTGGATCTTCTGTGCGATGGGTTGAGACCAACCAACGAGCATAGAGACTCGGT 1608

BnPLP1_DNA GAAAGCTCTAGCTAATGAAGATCCAGAGGCTAACTTGGCCAATTTGGTGTGTACCATTCTGTGTCGTGTTGATCCTATAA 1819
BnPLP2_DNA GAAAGCTCTAGCTAATGAAGAACAGAGACTAACTTGGCCAATTTGGTGTGTACCATTCTGTGTCGTGTTGATCCTATAA 1688

BnPLP1_DNA GAGCTAACTATTGGGCATGGAGGAAGAGCAAAATTACAGTGGCAATATAACCACACTTGAAAAAGTTATTTACTTTACG 1899
BnPLP2_DNA GAGCTAACTATTGGGCATGGAGGAAGAGCAAGATTACAGTGGCAATATAACCACACTTGAGAAAGTTATTTATTTTACG 1768

```

BnPLP1\_DNA TTTTAAACTACTGCTTTTTCATGAAACATGTTACCATACATCAAAACAAATCTTGATTTTCTTGGCTTCCCTTTTATT 1979  
BnPLP2\_DNA TTTTAATCTACTGCTTTTTCATGAAACATG-----ATGCATCAAAACAAATCTCGATTTCTCGG-----CTT 1831

BnPLP1\_DNA TTATTTTATCAATGCAAAATCTAATGAATGTCAACACTAACGTGTAGTATTGGGTTTGGAGTATTCAAACCCGGTTTCA 2059  
BnPLP2\_DNA CCCTTTTATCAATGCAAAATCTAATGACTAACCCTGCAGTATTG-----GGTTTTGGAATTCGAACCCGGTTTCA 1903

BnPLP1\_DNA TCATAATAAAAAATACAATCCCGGCTTGGGATAGATTCCGGTTCAACATTATGATTGTTGGACATGAAGGGAGAATGTGGT 2139  
BnPLP2\_DNA GCATATAAAAAATACAATCCCGGCTTGGGATAGATTCCGGTCAAAATATGATTGTTGGACATGAAGGGAGAATGTGGT 1983

BnPLP1\_DNA CACGTAA----- 2146  
BnPLP2\_DNA CACGTAAATTGCTTTGTCTTTCTGTGTGTTGTTGTATATGACAGAATGTGTGGTGTGTTGTGATATGTGAATGG 2056
